# Supplementary material for: Quaternized poly(arylene ether) ionomers containing triphenyl methane groups for alkaline anion exchange membranes
Source: Royal Society of Chemistry journal article supplement (doi:10.1039/c3ta00342f), 2013-01-01
Supplement: c3ta00342f.pdf [file c3ta00342f.pdf]

# Electronic Supplementary Information

## Quaternized Poly(arylene ether)s Ionomers Containing Triphenyl Methane Groups for Alkaline Anion Exchange Membranes

Xiuhua Li,<sup>\*,a,b</sup> Qunfang Liu,<sup>a,b</sup> Yingfeng Yu,<sup>a,b</sup> Yuezhong Meng<sup>c</sup>

<sup>a</sup> School of Chemistry & Chemical Engineering, South China University of Technology, Guangzhou 510641, P.R. China.  
Fax: +86-20-2223-6591; Tel: +86-20-2223-6591;

E-mail: [lixihua@scut.edu.cn](mailto:lixihua@scut.edu.cn)

<sup>b</sup> The Key Laboratory of Fuel Cell Technology of Guangdong Province, South China University of Technology, Guangzhou 510641, P.R. China.

<sup>c</sup> The Key Laboratory of Low Carbon Chemistry & Energy Conservation of Guangdong Province, Sun Yat-Sen University, Guangzhou 510275, P. R. China.

Supplementary <sup>1</sup>H NMR spectra were shown below.

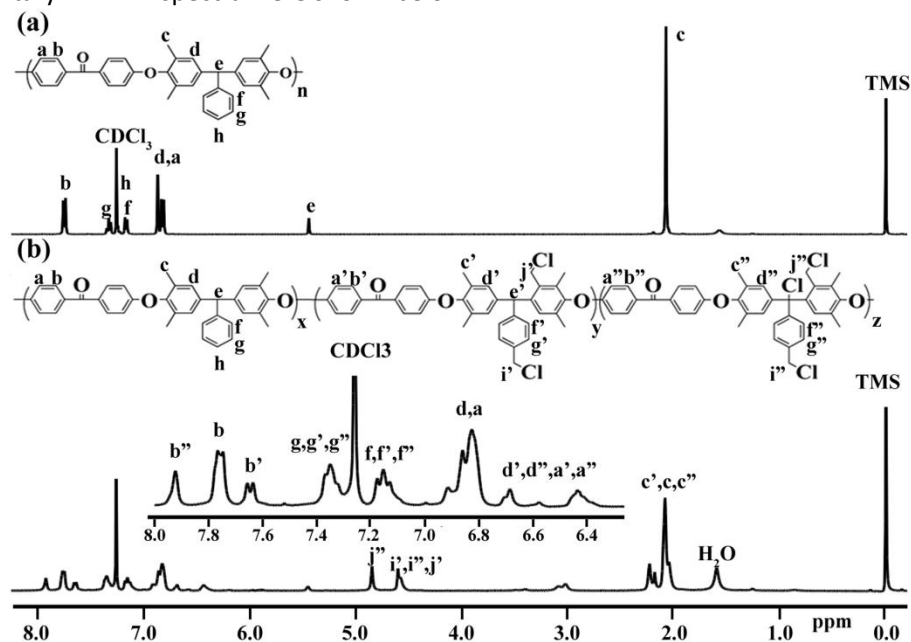

Fig. S1 <sup>1</sup>H NMR spectra of PAE-b and CMPAE-b.

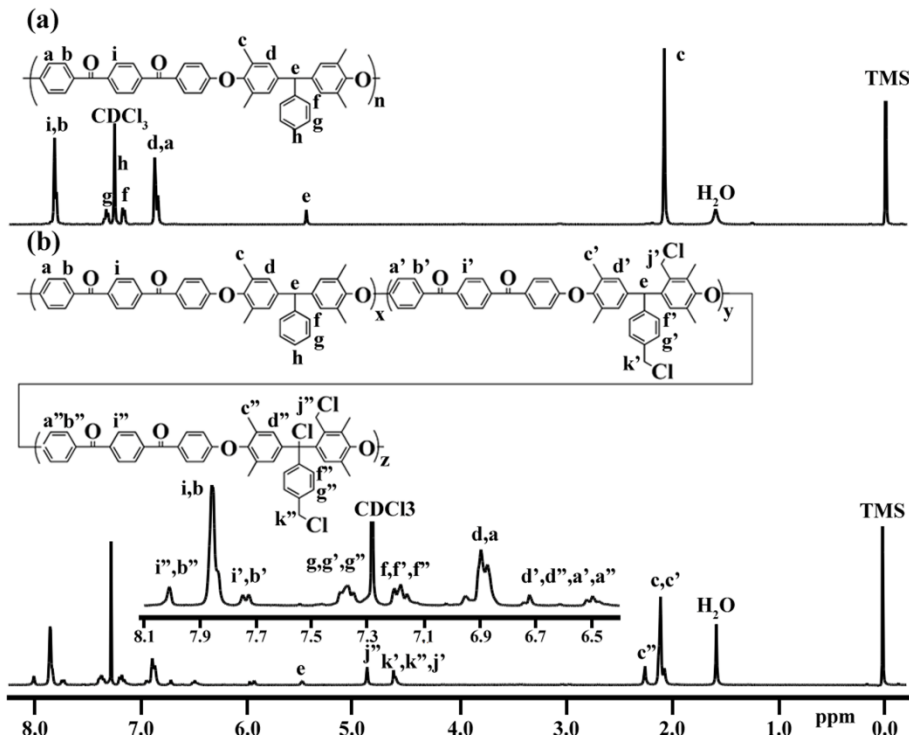

**Fig. S2**  $^1\text{H}$  NMR spectra of PAE-c and CMPAE-c.

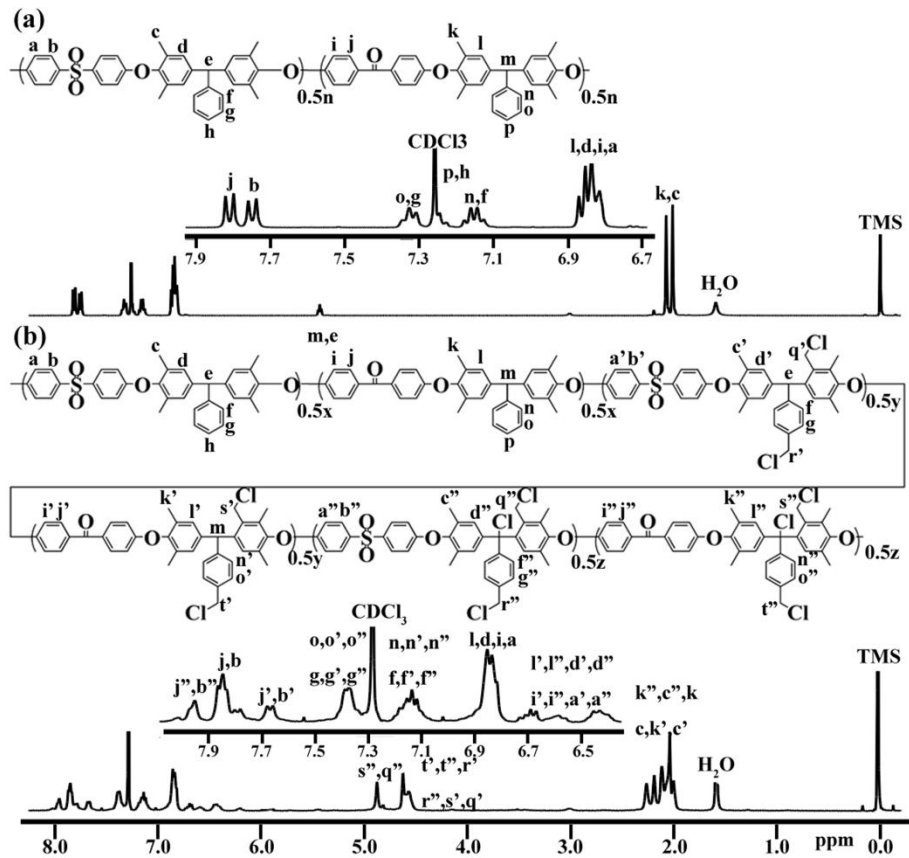

Fig. S3  $^1\text{H}$  NMR spectra of PAE-d and CMPAE-d.
